# 1 Engineering High-Quality Cartilage Microtissues 2 using Hydrocortisone Functionalised Microwells

3 Ross Burdis<sup>1,2,3</sup>, Gabriela Soares Kronemberger<sup>1,2,3</sup>, and Daniel J. Kelly<sup>1,2,3,4</sup> \*

4 <sup>1</sup> Trinity Centre for Biomedical Engineering, Trinity Biomedical Sciences Institute, Trinity College Dublin, Ireland.

5 <sup>2</sup> Department of Mechanical, Manufacturing and Biomedical Engineering, School of Engineering, Trinity College  
6 Dublin, Ireland.

7 <sup>3</sup> Advanced Materials and Bioengineering Research Centre (AMBER), Royal College of Surgeons in Ireland and  
8 Trinity College Dublin, Ireland.

9 <sup>4</sup> Department of Anatomy and Regenerative Medicine, Royal College of Surgeons in Ireland, Dublin, Ireland

10 \* Corresponding Author, **Email: [kellyd9@tcd.ie](mailto:kellyd9@tcd.ie)**

## 11 **Abstract**

12 Engineering clinically-relevant musculoskeletal tissues at a human scale is a considerable challenge.  
13 Developmentally-inspired scaffold-free approaches for engineering cartilage tissues have shown great  
14 promise in recent years, enabling the generation of highly biomimetic tissues. Despite the relative  
15 success of these approaches, the absence of a supporting scaffold or hydrogel creates challenges in  
16 the development of large scale tissues. Combining numerous scaled-down tissue units (herein termed  
17 *microtissues*) into a larger macrotissue represents a promising strategy to address this challenge. The  
18 overall success of such approaches, however, relies on the development of strategies to support the  
19 robust and consistent chondrogenic differentiation of clinically relevant cell sources such as  
20 mesenchymal stem/stromal cells (MSCs) within microwell arrays to biofabricate numerous  
21 microtissues rich in cartilage-specific extracellular matrix components. In this paper, we first describe  
22 a simple method to manufacture cartilage microtissues at various scales using novel microwell array  
23 stamps. This system allows the rapid and reliable generation of cartilage microtissues, and can be used  
24 as a platform to study microtissue phenotype and development. Based on the unexpected discovery  
25 that Endothelial Growth Medium (EGM) enhanced MSC aggregation and chondrogenic capacity within  
26 the microwell arrays, this work also sought to identify soluble factors within the media capable of  
27 supporting robust differentiation using heterogeneous MSC populations. Hydrocortisone was found  
28 to be the key factor within EGM that enhanced the chondrogenic capacity of MSCs within these  
29 microwell arrays. This strategy represents a promising means of generating large numbers of high-  
30 quality, scaffold-free cartilage microtissues for diverse biofabrication applications.

31 **Keywords:** Mesenchymal Stem/Stromal Cell, Chondrogenesis, Hydrocortisone,  
32 Microtissue, Microwell, Biofabrication, Cartilage Tissue Engineering

## 33 Introduction

34 Unlike traditional scaffold or hydrogel-based tissue engineering strategies, scaffold-free approaches  
35 are inherently reliant on the cell's own capacity to generate the bulk of the tissue/construct through  
36 the deposition of extracellular matrix (ECM). Although this follows a developmentally inspired  
37 paradigm and facilitates the generation of biomimetic *in vitro* cartilage tissues [1–10], in the absence  
38 of an interstitial 'bulking' scaffold or hydrogel material, creating tissues of scale can be challenging.  
39 Scaling down scaffold-free tissue units can support more robust differentiation, alleviate diffusion  
40 gradients, and ultimately improve matrix deposition [11–14]. Despite the numerous biological  
41 benefits associated with scaled-down 3D scaffold-free strategies [1,15,16], microtissues do not yet  
42 represent an idealised solution whereby robust ECM biosynthesis is guaranteed. A number of different  
43 stem/progenitor cell sources, including articular chondrocytes [13,17], mesenchymal stem/stromal  
44 cells (MSCs) [18–21], periosteal derived stem cells [12], and induced pluripotent stem cell (iPSC)  
45 derived cells [22], have been used for the biofabrication of cartilage microtissues. Multiple methods  
46 for forming multicellular spheroids/microtissues have been described [23], leveraging various non-  
47 adherent polymers [21,24–27] and hydrogels [12–14,28–33] as substrate materials. At present,  
48 cartilage microtissues are typically formed in a medium-to-high throughput manner using microwell  
49 moulds, whereby stem/progenitor cells are collected in the bottom of a non-adherent well and  
50 undergo cellular self-assembly/self-organisation to form a cellular spheroid. Under the appropriate  
51 exogenous soluble cues, the cells within these aggregates can be differentiated and begin to deposit  
52 a tissue-specific extracellular matrix (ECM), generating a microtissue. An ideal platform for generating  
53 microtissues for biofabrication can be defined as a scalable process, capable of supporting the  
54 development of standardised spheroids with defined shape, size and phenotype which can be used as  
55 part of a subsequent biofabrication strategy, such as bioprinting [34]. Closely coupled with the  
56 suitability of the method of forming microtissue building-blocks, is the quality of the microtissue  
57 formed. The chosen platform for generating microtissues should support key processes such as  
58 differentiation, phenotype commitment/maintenance, and the capacity for subsequent tissue fusion  
59 [34]. Evaluation of microtissue quality (ECM composition, cellular phenotype, and functionality) can  
60 be carried out using biochemical, histological, gene expression, and fusion assays.

61 Cellular heterogeneity, particularly with human MSCs, can result in poor chondrogenesis and  
62 impact the richness of any cartilage ECM generated *in vitro* [35]. Such donor-to-donor variation is well  
63 documented throughout the literature and has been shown to directly affect the *in vivo* performance  
64 of engineered cartilages [36]. Therefore, engineering numerous microtissues, rich in cartilage-specific  
65 ECM, in a practical and economical manner is challenging using MSC populations considering their  
66 inherently variable chondrogenic capacity. The increased interest in the use of cellular spheroids,

67 microtissues, and/or organoids as biological building-blocks for engineering functional osteochondral  
68 tissues/organs demands the development of strategies ideally suited to the biofabrication of large  
69 numbers of homogeneous and phenotypically defined microtissues. Engineering large numbers of  
70 such microtissues using clinically relevant cell sources requires the careful consideration of culture  
71 conditions that regulate key outcomes such as microtissue phenotype (e.g. cell types and specific  
72 growth factors), quality (e.g. mitigating diffusion gradients and nutrient limitations) and size (e.g. cell  
73 numbers) [37]. In the context of cartilage and osteochondral tissue engineering, early research in this  
74 area has focused on the use of undifferentiated MSC aggregates [38,39]. These immature aggregates  
75 do not mimic the complex native ECM, which may explain why they fail to promote the regeneration  
76 of hyaline cartilage when implanted into pre-clinical models for chondral/osteochondral defects  
77 [40,41]. Therefore new approaches for engineering high quality cartilage microtissues at scale using  
78 clinically relevant cell sources are required.

79 With this in mind, generating cartilage and osteochondral tissues of scale using  
80 microtissue/aggregate engineering will require the high-throughput production of consistently high-  
81 quality cartilage microtissues. In particular, methods for consistently engineering quality cartilage  
82 microtissues from diverse donors with different chondrogenic capacity is required. Without well-  
83 defined markers for identifying MSCs within primary isolations, many tissue engineers use  
84 uncharacterised cohorts of cells for generating tissues, which in turn can reduce the reliability and  
85 quality of the engineered cartilages. The identification of a simple method for improving the  
86 chondrogenic capacity of uncharacterised MSC populations, isolated from bone marrow, could help  
87 to limit the variability seen in cartilage tissue engineering. Specifically, in the context of cartilage  
88 microtissue/aggregate engineering, the identification of protocols combatable with microwell  
89 platforms typically used in the biofabrication of such microtissues are required. Ultimately, these high-  
90 quality cartilage microtissues can be used as building blocks to more efficiently engineer cartilage and  
91 osteochondral tissues of scale. In this paper we first describe the design of two microwell arrays that  
92 can be used to directly pattern a hydrogel into an ideal platform for engineering cartilage microtissues.  
93 We demonstrate the capacity to consistently form spherical cell aggregates within both the medium-  
94 and high-throughput microwell systems, generating cartilage microtissues of different  
95 maturities/phenotypes. Based on a serendipitous observation that Endothelial Growth Medium (EGM)  
96 enhanced MSC aggregation and chondrogenic capacity in bone-marrow derived MSCs (BMSCs), this  
97 study also sought to elucidate the driving factor(s) supporting such differentiation within EGM.  
98 Ultimately, our aim was to improve upon current chondrogenic culture regimes and create a novel  
99 platform for engineering high-quality, scaffold-free cartilage microtissues at scale.

## 100 **Materials & Methods**

### 101 **Media Formulations**

102 *Expansion Medium “XPAN”*. XPAN is composed of high glucose Dulbecco’s modified eagle’s medium  
103 (hgDMEM) GlutaMAX supplemented with 10 % v/v FBS, 100 U/mL penicillin, 100 µg/mL streptomycin  
104 (all Gibco, Biosciences, Dublin, Ireland) and 5 ng/mL FGF2 (Prospect Bio).

105 *Endothelial Growth Medium (EGM)*. EGM is composed of Endothelial Cell Basal Medium-2 (EBM)  
106 (Lonza) supplemented with MV Microvascular Endothelial Cell Growth Medium-2 BulletKit™ (Lonza).  
107 As the concentration of the supplements added to EBM are proprietary information, the  
108 concentrations for each are given as a %v/v. Fetal bovine serum (FBS) was added at 5 %,  
109 Hydrocortisone (Hydro) was added at 0.04 %, human FGF-2 (FGF) was added at 0.4 %, vascular  
110 endothelial growth factor (VEGF), recombinant human long R3 insulin like growth factor 1 (IGF),  
111 ascorbic acid (AA), and human epidermal growth factor (EGF) were all added at 0.1 %. Finally,  
112 gentamicin sulfate-Amphotericin (GA-1000) was added at 0.1 %.

113 *Chondrogenic Differentiation Medium (CDM)*. hgDMEM GlutaMAX supplemented with 100 U/mL  
114 penicillin, 100 µg/mL streptomycin (both Gibco), 100 µg/mL sodium pyruvate, 40 µg/mL L-proline, 50  
115 µg/mL L-ascorbic acid-2-phosphate, 4.7 µg/mL linoleic acid, 1.5 mg/mL bovine serum albumin, 1 X  
116 insulin–transferrin–selenium (ITS), 100 nM dexamethasone (all from Sigma), 2.5 µg/mL amphotericin  
117 B and 10 ng/mL of human transforming growth factor-β3 (TGF-β) (Peprotech, UK).

118 *Hypertrophic Differentiation Medium (HYP)* was composed of hgDMEM GlutaMAX supplemented with  
119 100 U/ml penicillin, 100 µg/mL streptomycin (both Gibco), 1 × ITS, 4.7 µg/ml linoleic acid, 50 nM  
120 thyroxine, 100 nM dexamethasone, 250 µM ascorbic acid, 7 mM β-glycerophosphate and 2.5 µg/mL  
121 amphotericin B (all from Sigma).

### 122 **Bone Marrow Mesenchymal Stem/Stromal Cell (BMSC) Isolation**

123 *Goat BMSC (gBMSC) isolation*. gBMSCs were harvested under sterile conditions from the sternum of  
124 skeletally mature, female, Saanen goats. Briefly, excised bone marrow was dissected into small pieces  
125 using a scalpel. The marrow pieces were then gently rotated for 5 min in XPAN to help liberate the  
126 cellular components. The culture medium was then aspirated and passed through a 70 µm cell sieve  
127 prior to counting and plating at a density of  $57 \times 10^3$  cells/cm<sup>2</sup> and expanded under hypoxic conditions  
128 (37 °C in a humidified atmosphere with 5 % CO<sub>2</sub> and 5 % O<sub>2</sub>) for chondrogenic differentiation. Following  
129 colony formation, gBMSCs were trypsinised using 0.25 % (w/v) Trypsin Ethylenediaminetetraacetic  
130 acid (EDTA). gBMSCs for microtissues were expanded from an initial density of 5000 cells/cm<sup>2</sup> in XPAN  
131 medium under physioxic conditions until P3.

132 *Human BMSC (hBMSC) isolation.* hBMSCs were isolated from unprocessed human bone marrow  
133 (Lonza) on the basis of plastic adherence. Briefly, unprocessed bone marrow was plated at  $2.5 \times 10^5$   
134 cells/cm<sup>2</sup> (estimated approx. 4000 - 5000 MSCs/cm<sup>2</sup>) in XPAN medium and expanded under  
135 physiological oxygen conditions (37 °C in a humidified atmosphere with 5 % CO<sub>2</sub> and 5 % O<sub>2</sub>). Following  
136 colony formation, hBMSCs were trypsinised using 0.25 % (w/v) Trypsin Ethylenediaminetetraacetic  
137 acid (EDTA), hBMSCs were expanded in XPAN under physioxic conditions (5 % O<sub>2</sub>) and aggregated into  
138 pellets at P3.

### 139 **Microwell Platform Design, Fabrication and Validation**

140 Microwell stamps were designed using Solidworks CAD software. A summary of the dimensions of the  
141 positive microwell stamps can be found in Figure 1A. Both the medium- and high-throughput  
142 microwell arrays were designed to avoid flat sections between adjacent microwells. The medium-  
143 throughput wells were designed to maintain discrete microtissues within individual microwells from  
144 extended culture periods, and as such had a relatively deep well. In contrast, the microwells in the  
145 high-throughput system were designed to maximise the number of microwells per macro-well, making  
146 each well considerable smaller in dimension. The base of the high-throughput wells was designed to  
147 be flat to maintain print fidelity as creating a curved or pointed base would require dimensions that  
148 exceeded the printer's resolution (Both in x,y directions and laser spot size). Both microwell stamps  
149 were fabricated using a Form 3 stereolithography (SLA) printer and the high-temperature resin (V2)  
150 (both Formlabs, Massachusetts, United States). Prior to printing, a STL file for the part was prepared  
151 using Preform 2.16.0 software (Formlabs, Massachusetts, United States), setting a 0.025 µm layer  
152 height defined the resolution of the print. Completed parts were washed in propan-2-ol (Sigma  
153 Aldrich) to clear any uncured resin, following which they were exposed to UV light (405 nm, 9.1 W)  
154 (Form cure, Formlabs, Massachusetts, United States) for 120 min at 80°C to ensure complete  
155 crosslinking. Before use, stamps were autoclave sterilised. Hydrogel microwells were moulded using  
156 the same procedure as previously described [10]. Briefly, under sterile conditions, 4 % (w/v) molten  
157 agarose was patterned using the microwell stamps within the wells of a 6 well-plate. Once cooled, the  
158 stamps were removed and the agarose microwells soaked overnight in an appropriate media type  
159 before cell seeding.

160 To validate the capacity of the hydrogel microwells to form spherical cellular aggregates and  
161 cartilage microtissues, an appropriate cell suspensions (gBMSC) was pipetted into the macrowells to  
162 achieve a final density of  $4 \times 10^3$  cells/microwell. Well plates were then centrifuged at 700 x g for 5  
163 minutes, and returned to physioxic conditions (37 °C in a humidified atmosphere with 5 % CO<sub>2</sub> and 5  
164 % O<sub>2</sub>) overnight to allow aggregation to occur (~18 hours). The following day, media was exchanged

165 to induce chondrogenesis (CDM) and changed every two days until the end point. For hypertrophic  
166 cartilage microtissues, after 14 days of chondrogenic cultivation (CDM) HYP media was used for a  
167 further 7 days to induce mineralisation of the cartilage microtissues.

## 168 **Experimental Design**

169 For all studies, microwells were seeded at a density that results in  $4 \times 10^3$  cells/microtissue. Cell  
170 expansion and cartilage microtissue cultivation took place at physiological oxygen conditions (37 °C in  
171 a humidified atmosphere with 5 % CO<sub>2</sub> and 5 % O<sub>2</sub>). With the exception of the first 24 hours, media  
172 was exchanged every 2 days. Initial investigation using gBMSCs involved 21 Days of chondrogenic  
173 culture. All studies using hMSCs were carried out over 7 days of chondrogenic cultivation.

174 *Control Group.* Here, cartilage microtissues are formed by seeding bMSCs into the microwells in XPAN.  
175 The following day, the XPAN medium is carefully aspirated from the wells and replaced with CDM.

176 *EGM Group.* EGM was used to soak the agarose hydrogel microwells overnight prior to seeding. As  
177 such, cells seeded into the microwells in the 'EGM' group were never directly exposed to EGM. The  
178 seeding procedure and following chondrogenic culture was identical to the control group.

179 *Media Component Isolation Groups.* By means of determining the prominent factor within EGM that  
180 aided in chondrogenesis, a screening study was undertaken. Each of the supplements listed in §2.1 for  
181 EGM formulation were added at the correct concentration (%v/v) to both XPAN during pre-soaking  
182 and seeding, as well as CDM during differentiation culture. Chondrogenic and experimental EGM  
183 supplements were added to the basal media of CDM fresh prior to media exchange. Additionally,  
184 blends of XPAN/CDM and EGM were used. In these groups EGM was supplemented as a 1× or 2×  
185 formulation and then mixed 50/50 with either XPAN, for soaking and seeding, or with CDM (2×) for  
186 chondrogenic differentiation. Summaries of the experimental groups and media compositions can be  
187 found in supplementary figure 1 and supplementary table 1.

## 188 **Histological Analysis**

189 Samples were fixed using 4 % paraformaldehyde (PFA) solution overnight at 4 °C. After fixation,  
190 samples were dehydrated in a graded series of ethanol solutions (70 % - 100 %), cleared in xylene, and  
191 embedded in paraffin wax (all Sigma-Alrich). Prior to staining tissue sections (5 µm) were rehydrated.  
192 Sections were stained with haematoxylin and eosin (H&E), 1 % (w/v) alcian blue 8GX in 0.1 M  
193 hydrochloric acid (HCL) (AB) to visualise sulphated glycosaminoglycan (sGAG) content and counter-  
194 stained with 0.1 % (w/v) nuclear fast red to determine cellular distribution, 0.1 % (w/v) picosirius red  
195 (PSR) to visualise collagen deposition, and 1 % (w/v) alizarin red (pH 4.1) to determine mineral



196 deposition *via* calcium staining (all from Sigma-Aldrich). Stained sections were imaged using an Aperio  
197 ScanScope slide scanner.

### 198 **Quantitative Biochemical Analysis**

199 Samples were washed in PBS after retrieval and the number of microtissues within each technical  
200 replicate counted prior to digestion. A papain enzyme solution, 3.88 U/mL of papain enzyme in  
201 100mM sodium phosphate buffer/5mM Na<sub>2</sub>EDTA/10mM Lcysteine, pH 6.5 (all from Sigma–Aldrich),  
202 was used to digest the samples at 60 °C for 18 hours. DNA content was quantified immediately after  
203 digestion using Quant-iT™ PicoGreen® dsDNA Reagent and Kit (Molecular Probes, Biosciences). The  
204 amount of sGAG was determined using the dimethylmethylene blue dye-binding assay (Blyscan,  
205 Biocolor Ltd., Northern Ireland), with a chondroitin sulphate standard read using the Synergy HT multi-  
206 detection micro-plate reader (BioTek Instruments, Inc) with a wavelength set to 656 nm. Total collagen  
207 content was determined using a chloramine-T assay [42] to measure the hydroxyproline content and  
208 calculated collagen content using a hydroxyproline-to-collagen ratio of 1:7.69. Briefly, samples were  
209 mixed with 38 % HCL (Sigma) and incubated at 110 °C for 18 hours to allow hydrolysis to occur.  
210 Samples were subsequently dried in a fume hood and the sediment reconstituted in ultra-pure H<sub>2</sub>O.  
211 2.82 % (w/v) Chloramine T and 0.05 % (w/v) 4-(Dimethylamino) benzaldehyde (both Sigma) were  
212 added and the hydroxyproline content quantified with a trans-4-Hydroxy-L-proline (Fluka analytical)  
213 standard using a Synergy HT multi-detection micro-plate reader at a wavelength of 570 nm (BioTek  
214 Instruments, Inc).

### 215 **Image Quantification & Statistical Analysis**

216 Diameter measurement of growing microtissues were taken from microscope images (4×) using  
217 ImageJ software. Statistical analysis was performed using GraphPad Prism software (GraphPad  
218 Software, CA, USA). Analysis of differences between two groups at one timepoint was done using a  
219 standard two-tailed t-test. For two groups over multiple time-points a one-way analysis of variance  
220 (ANOVA) was performed. Numerical and graphical results are presented as mean ± standard deviation  
221 unless stated otherwise. Significance was determined when  $p < 0.05$ .



## 222 Results

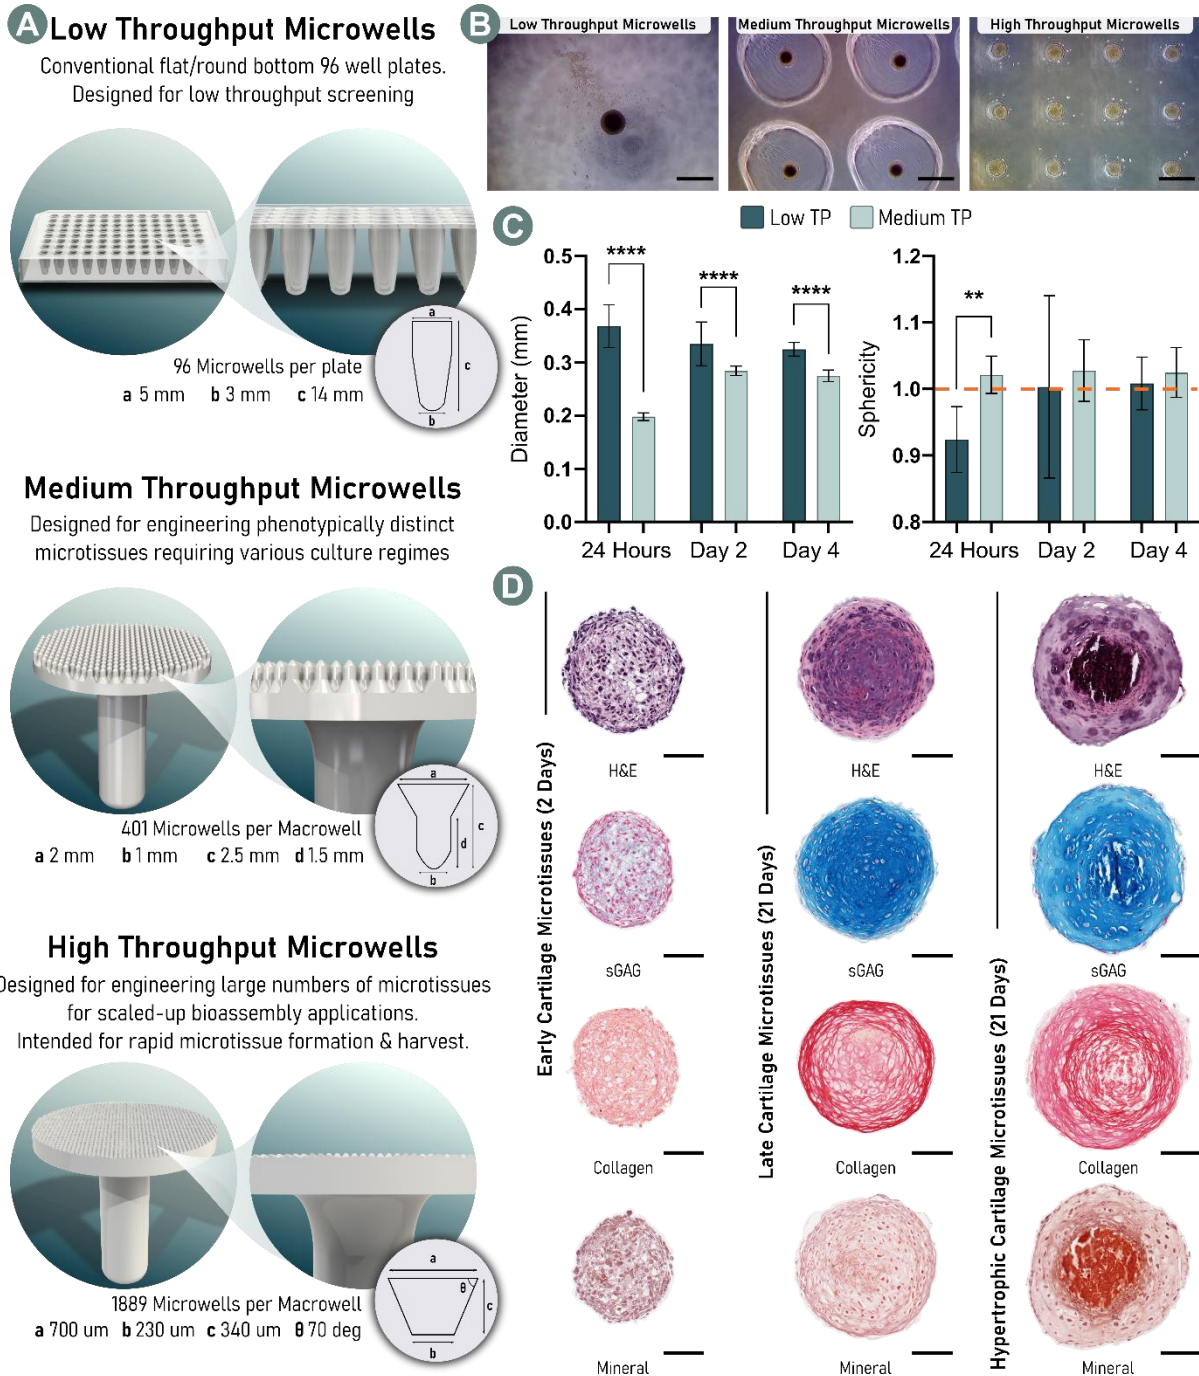

**Figure 1. Microwell platform design and validation.** A) Schematic representation of three platforms for generating spherical cartilage microtissues. Our medium- and high-throughput systems have been designed to directly pattern a hydrogel substrate within a conventional 6 well-plate. B) Microscopic images of spherical cellular aggregates formed after 2 days within each platform (Scale Bar = 500  $\mu$ m). C) Quantification of microtissue diameter and sphericity (orange line indicates a perfect sphere) after 24 hours, 2 days, and 4 days of cultivation within the low- and medium-throughput systems. Significant differences were tested using a Šidák's multiple comparisons test, ordinary two-way ANOVA, where; \*\* denotes  $p < 0.01$  and \*\*\*\* denotes  $p < 0.0001$ , ( $N = 10$ , Mean  $\pm$  SD). D) Histological analysis of phenotypically distinct cartilage microtissues displaying markers of early-, late-, and hypertrophic-cartilage (Scale Bar = 100  $\mu$ m).

## 223 **Microwell Platforms for Microtissue Biofabrication**

224 We developed two microwell platforms ideally suited to engineer numerous cartilage microtissues  
225 and compared these to standard 96 well plates (Figure 1A). Both the medium- and high-throughput  
226 microwell stamps were designed to directly pattern an agarose hydrogel within a conventional 6 well-  
227 plate [10]. The medium-throughput stamp generates 401 round bottom microwells with a sufficient  
228 well depth to maintain discrete microtissues within individual microwells for extended culture periods  
229 allowing for numerous media changes. Such platforms can be used for the engineering of cartilage  
230 microtissues with various phenotypes (Figure 1D) and/or investigating microtissue development  
231 under various culture conditions. Although all platforms support the formation of spherical cell  
232 aggregates (Figure 1B), we demonstrated that our custom microwell platforms result in a more rapid  
233 and reliable spheroid formation when compared to a conventional 96 well plate (Figure 1C). The  
234 medium-throughput hydrogel microwell was hereon in used as the platform for investigating novel  
235 culture conditions for supporting enhanced chondrogenesis.

## 236 **Endothelial Growth Media (EGM) Treatment Enhances Aggregation and Chondrogenesis of** 237 **BMSCs**

238 Soaking agarose hydrogel microwells with EGM prior to cell seeding appeared to have a rapid and  
239 potent effect on the self-organisation of gBMSCs into a cellular spheroid. By day 2, gBMSC aggregates  
240 were significantly larger, and microscopically appeared to include all of the cells which had been  
241 seeded into the individual microwells (Figure 2Ai). In contrast, gBMSC aggregates generated within  
242 XPAN soaked microwells had a smaller average diameter, with a large numbers of cells not coalescing  
243 within the spheroid, instead appearing at the bottom of the microwell. These significant differences  
244 in size were maintained throughout the culture period, resulting in a final average microtissue  
245 diameter of  $0.403 \pm 0.03 \mu\text{m}$  and  $0.311 \pm 0.026 \mu\text{m}$  for EGM and XPAN soaked microwells respectively  
246 (Figure 2Aii). Histologically, both microtissue cohorts exhibited canonical markers for chondrogenic  
247 differentiation, with positive matrix staining for sGAG and collagen deposition. In the EGM pre-soak  
248 group, the intensity of the staining indicated a richer cartilaginous ECM. Neither group stained positive  
249 for calcium deposition, providing evidence that the cartilage has not yet progressed towards a mature  
250 hypertrophic phenotype (Figure 2B). Biochemical evaluation demonstrated that there were  
251 significantly higher levels of DNA, sGAG, and collagen per microtissue when the microwells were  
252 soaked with EGM compared to XPAN. Additionally, the levels of sGAG and collagen deposited,  
253 normalised to DNA content, demonstrated that EGM treatment resulted in a higher biosynthetic  
254 output at a cellular level (Figure 2C). Collectively, these results indicated that EGM treatment resulted  
255 in the generation of larger, more cellular microtissues containing higher levels of cartilage-specific

256 ECM components. Moreover, the cells within the microtissue demonstrated a higher synthetic output  
 257 compared to those undergoing a traditional chondrogenic culture regime.

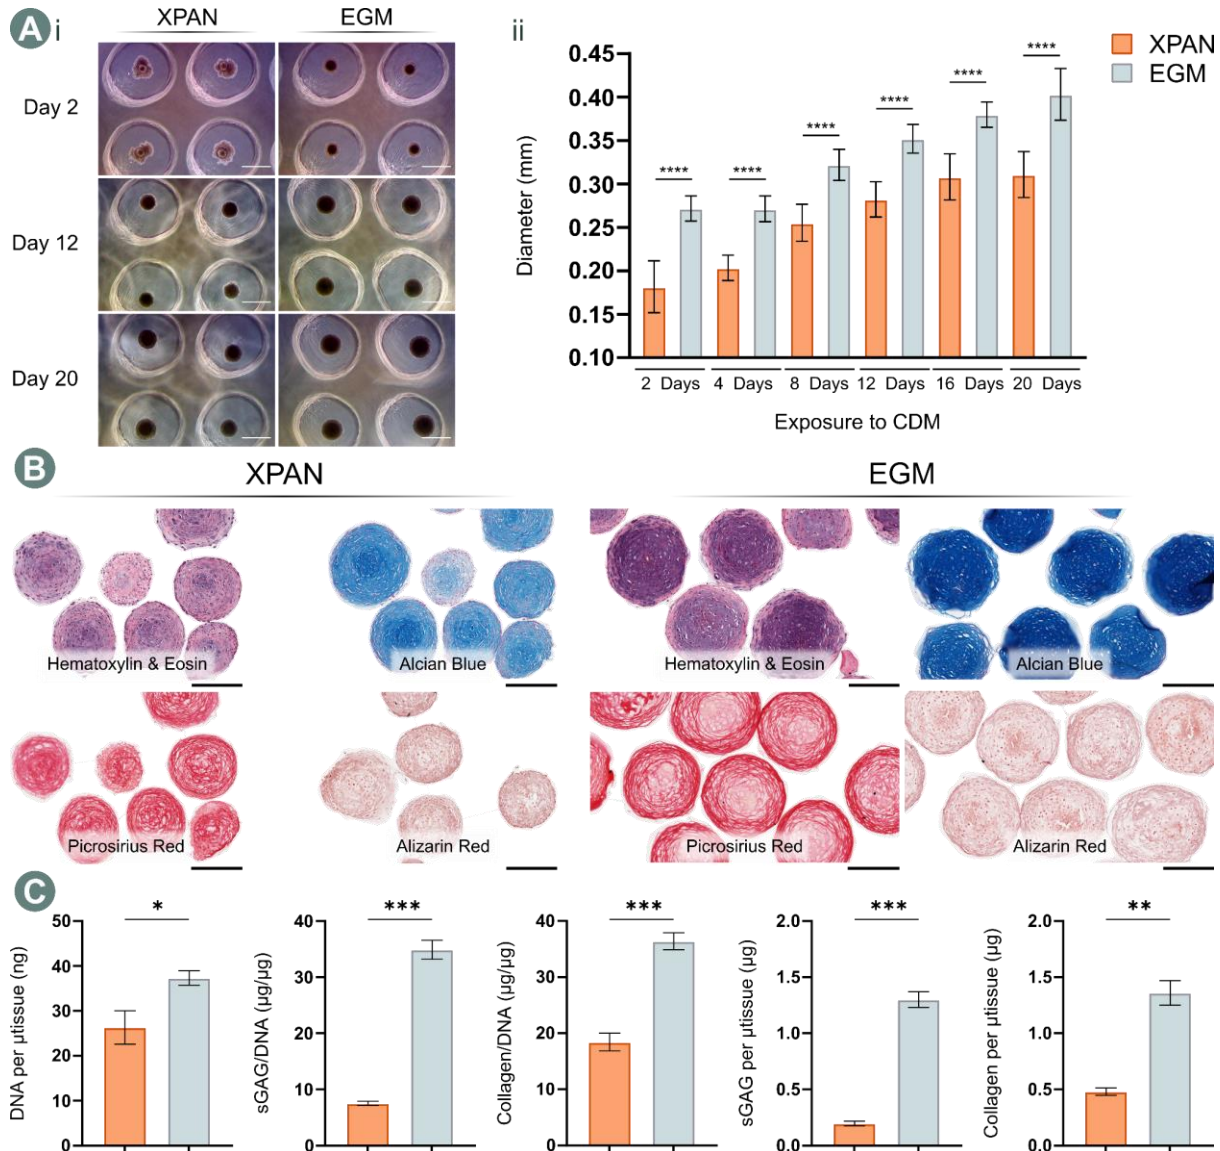

**Figure 2.** Soaking hydrogel microwells with EGM results in a richer matrix within cartilage microtissues. A) Microscopic images at days 2, 12, and 20 during chondrogenic culture (Scale bar = 500  $\mu\text{m}$ ), and quantification of diameter (ii) as a non-destructive metric for microtissue development. \*\*\*\* denotes significance when tested using a Šidák's multiple comparisons test, two-way ANOVA, where  $p < 0.0001$ , ( $N = 20$ , Mean  $\pm$  SD). B) Histological evaluation of cartilage microtissues after 21 days of chondrogenic culture (Scale bar = 200  $\mu\text{m}$ ). C) Biochemical quantification of the cartilage microtissues after 21 days. \* denotes significance using a two-tailed, unpaired Welch's t-test, where; \* indicates  $p < 0.05$ , \*\* indicates  $p < 0.01$ , and \*\*\* indicates  $p < 0.001$  ( $N = 3$ , Mean  $\pm$  SD).

## 258 **Hydrocortisone Supports Enhanced Chondrogenesis in Human BMSCs**

259 EGM contains multiple factors that potentially enhance chondrogenesis of BMSCs in this microtissue  
260 model (Supplementary table 1). This motivated an investigation to identify the predominant driving  
261 factors within the EGM. Additionally, to improve its clinical relevance, this empirical study was  
262 undertaken using hBMSCs. To this end, hBMSCs within the microwell system were cultured in media  
263 supplemented with each factor used within the EGM formulation. These factors were added to both  
264 the XPAN used during soak loading and seeding, as well as to CDM during chondrogenic induction. A  
265 typical chondrogenic culture regime 'control' was also carried out, as well as EGM soak loading (here  
266 termed 'EGM'), which was identical to the protocol shown to be effective in animal derived BMSCs.  
267 After 7 days of *in vitro* chondrogenesis, differences in microtissue size were apparent microscopically  
268 (Figure 3B). Cellular arrangement also appeared to vary within the microtissues depending on which  
269 additional EGM supplement was provided (Figure 3A). Histologically, archetypal cartilage spheroids  
270 were seen in the control, EGM, and hydrocortisone (Hydro) groups. Although other supplements did  
271 not entirely suppress chondrogenesis, with sGAG and collagen deposition detected in all groups at  
272 varying levels, they did result in condensed, highly cellular and atypical cartilage spheroids. When  
273 compared to a standard chondrogenic culture regime (control), supplementation with hydrocortisone  
274 resulted in significantly higher levels of DNA per microtissue, as well as a higher deposition of sGAG  
275 per cell (Figure 3C). Although EGM soaking did not significantly influence the DNA levels within the  
276 microtissues in hBMSCs, its effect on biosynthetic output did mirror observations made previously  
277 with gBMSCs, whereby pre-soaking with EGM resulted in a significantly richer cartilaginous ECM  
278 profile compared to standard chondrogenic culture conditions (control).

279 To confirm the effect of EGM and hydrocortisone treatment on hMSC chondrogenesis in this  
280 microtissue system, the key groups from the above experiment were repeated using cells isolated  
281 from a different human donor. Diameter measurements taken during the 7 days *in vitro* revealed  
282 similar responses in terms of microtissue growth in both experimental groups (Figure 4A). Although  
283 microtissues within these groups remained significantly larger than those under conventional  
284 chondrogenic conditions, unlike in the previous study, the diameter of microtissues in the control  
285 group also increased over the 7 days. Histologically, all groups supported robust chondrogenic  
286 differentiation and the deposition of cartilage specific ECM components (Figure 4B). Biochemical  
287 quantification of the cartilage microtissues indicated that significantly higher levels of sGAG/DNA and  
288 sGAG/microtissue could be achieved using the EGM soak loading and hydrocortisone treatments  
289 respectively. Despite this, there was no significant benefit in terms of collagen deposition for either  
290 experimental group. Interestingly, the baseline chondrogenic capacity of the donor investigated  
291 within this study appeared far superior to that of the previous hBMSCs. Under standard chondrogenic

292 conditions (control), the sGAG/DNA was  $5.50 \pm 0.175$ , compared to  $2.81 \pm 0.236$  for the previous  
293 donor. The difference in collagen deposition per cell was more pronounced, with  $25.9 \pm 1.13$   
294 collagen/DNA for this donor versus  $5.83 \pm 0.887$  collagen/DNA for the previous donor. This suggests  
295 that the beneficial effects of such treatments are more pronounced when the baseline levels of  
296 chondrogenesis are relatively low.



297

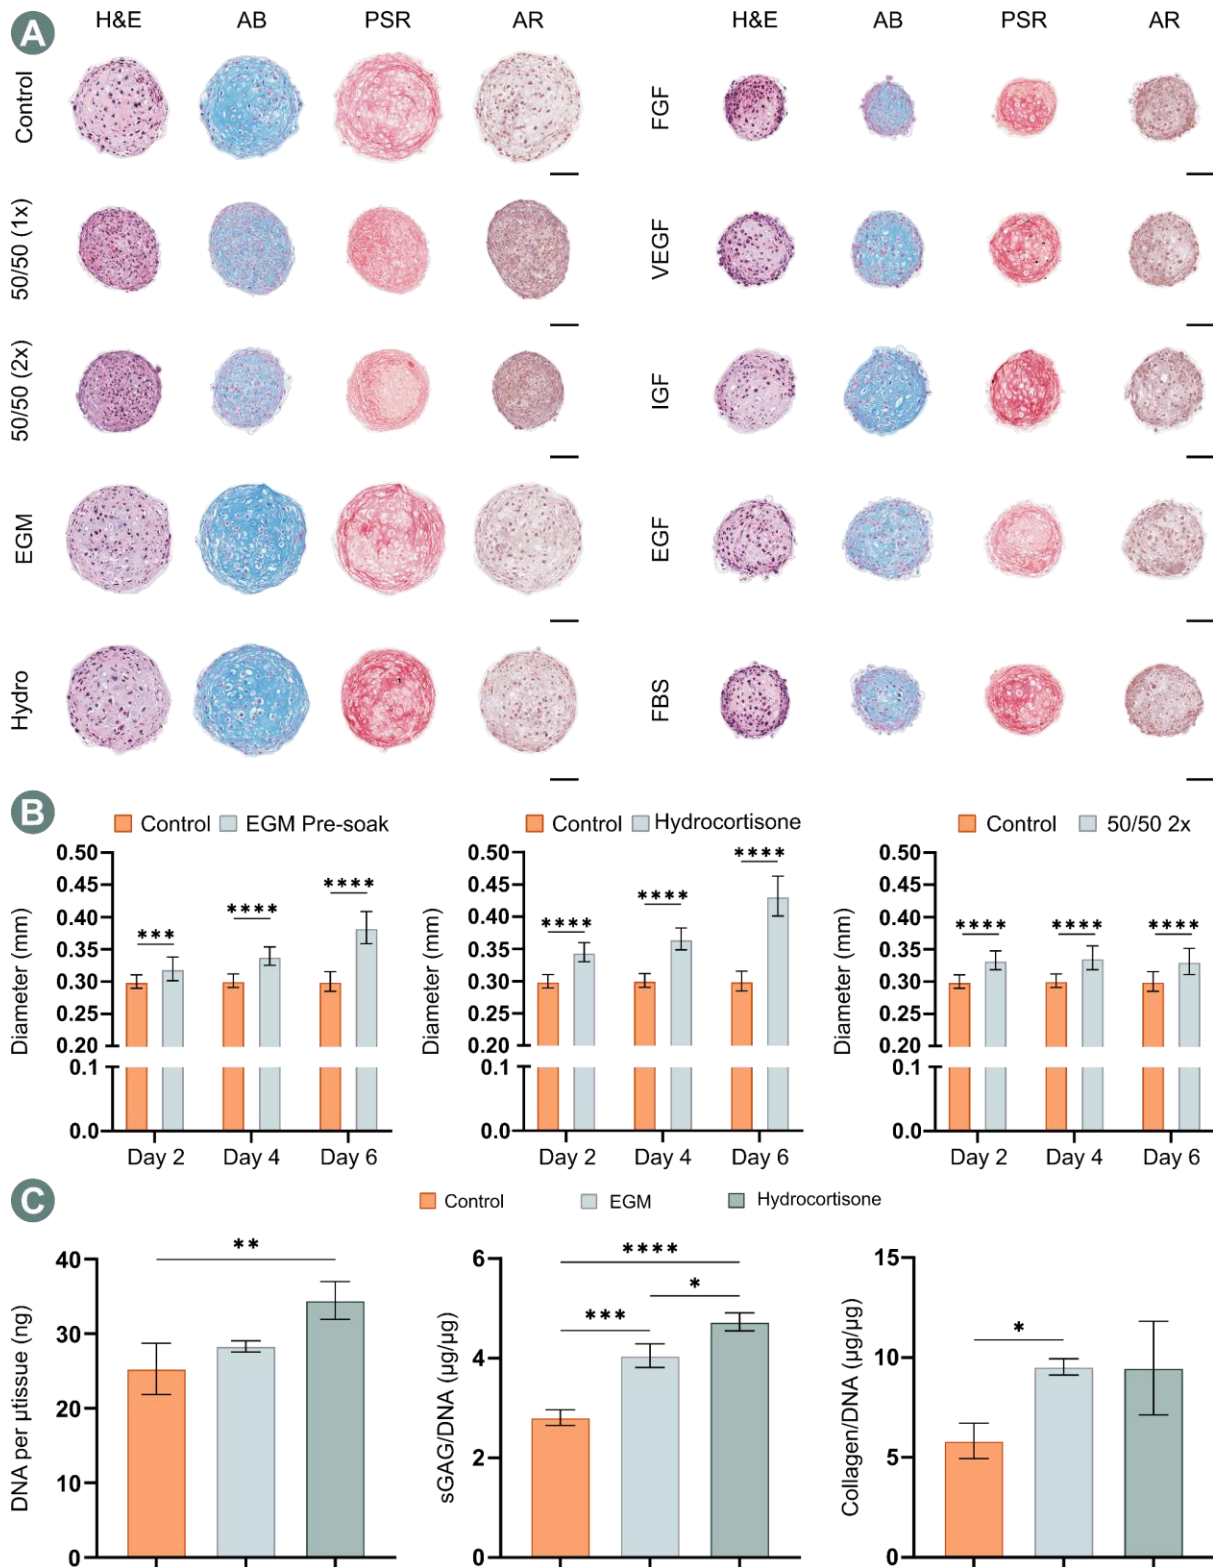

**Figure 3.** Hydrocortisone is the driving factor in EGM that improved chondrogenesis. A) Histological panel of microtissues, representing each EGM supplement, after 7 days of chondrogenic... (figure caption continued on following page)

culture (Scale Bar = 100  $\mu$ m). B) Diameter measurements during culture, \* denotes significance when tested using a Šídák's multiple comparisons test, two-way ANOVA, where; \*\*\* indicates  $p < 0.001$  and \*\*\*\* indicates  $p < 0.0001$ , ( $N = 20$ , Mean  $\pm$  SD). C) Biochemical quantification of the cartilage microtissues after 7 days of chondrogenic culture. Hydrocortisone treatment compared to typical chondrogenic conditions (control) and positive control group (EGM) demonstrated a significant increase in DNA content and sGAG deposition. \* denotes significance using an Ordinary One-way ANOVA with a Tukey's multiple comparisons test, where; \* indicates  $p < 0.05$ , \*\* indicates  $p < 0.01$ , and \*\*\* indicates  $p < 0.001$ , and \*\*\*\* indicates  $p < 0.0001$  ( $N = 3$ , Mean  $\pm$  SD).

298

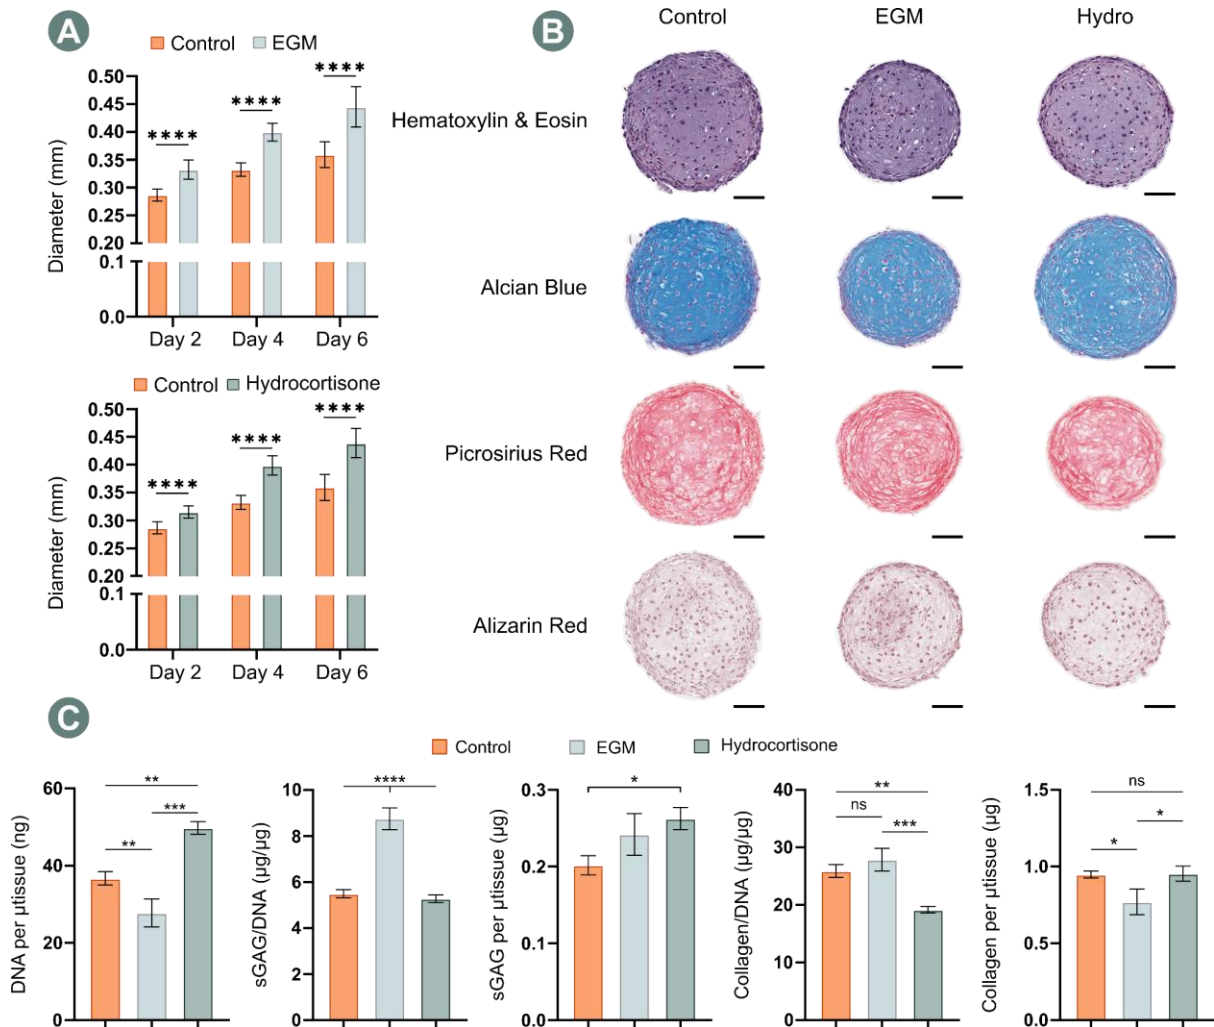

**Figure 4.** The effect of both EGM pre-soaking and hydrocortisone supplementation is lessened in a more chondrogenic hBMSC population. A) Quantification of microtissue diameter. \*\*\*\* denotes significance when tested using a Šídák's multiple comparisons test, two-way ANOVA, where  $p < 0.0001$ , ( $N = 25$ , Mean  $\pm$  SD). B) Histological evaluation of cartilage microtissues after 7 days of chondrogenic culture (Scale bar = 100  $\mu$ m). C) Biochemical quantification of the cartilage microtissues after 21 days. \* denotes significance using an Ordinary One-way ANOVA with a Tukey's multiple comparisons test, where; ns indicates  $p > 0.05$ , \* indicates  $p < 0.05$ , \*\* indicates  $p < 0.01$ , \*\*\* indicates  $p < 0.001$ , and \*\*\*\* indicates  $p < 0.0001$  ( $N = 3$  for control & Hydro,  $N = 4$  for EGM, Mean  $\pm$  SD).



## 299 Discussion

300 This study aimed to establish a novel protocol for ensuring the generation of high-quality cartilage  
301 microtissues. Soaking hydrogel microwells in fully supplemented EGM a day prior to seeding gBMSCs  
302 was found to enhance cellular aggregation and cause a significant improvement in chondrogenesis. At  
303 day 2, all cells within the microwells of the EGM group had coalesced, forming large spherical  
304 aggregates. In contrast, a standard chondrogenic protocol yielded relatively small cell aggregates with  
305 a large number of unengaged cells surrounding the spheroids. By day 21 of culture, histological and  
306 biochemical evaluation indicated that a more cartilaginous ECM could be generated by soak loading  
307 the microwells with EGM prior to seeding. Cartilage matrix components (sGAG and collagen) were  
308 more extensively deposited in the EGM group compared to the control condition. Moreover, the  
309 increased abundance of ECM proteins was not only due to more cellular microtissues, as evident by  
310 higher DNA content after 21 days of culture, but also as a result of the increased biosynthetic output  
311 of the resident cell population within the EGM microtissues. Collectively, this preliminary study  
312 indicated that factor(s) within EGM provide potent cues capable of improving the chondrogenic  
313 capacity of an uncharacterised BMSCs population.

314 Next, we sought to determine if a single component within the EGM was primarily responsible  
315 for the aforementioned results using more clinically relevant hBMSCs. Within the supplement profile  
316 of EGM, basic FGF/FGF-2 (FGF) and insulin-like growth factor (IGF) were potential candidates for  
317 driving improved chondrogenesis. FGF is known to maintain MSCs in an immature state, enhance their  
318 proliferation during *in vitro* expansion and their subsequent differentiation potential [43].  
319 Additionally, the treatment of hMSCs with FGF during expansion has given rise to enhanced  
320 chondrogenesis [44,45]. Specifically, chondrogenic aggregates formed using cells treated with FGF  
321 during monolayer expansion were larger and expressed higher proteoglycan content. Additionally,  
322 FGF-treated cells have been formed into cartilage spheroids that lacked collagen type I and expressed  
323 collagen type II in their periphery [45]. FGF signalling, although not critical for chondrogenesis, has  
324 been associated with improved chondrogenic differentiation of hMSCs [46]. However, prolonged  
325 treatment with FGF during MSC condensation and early chondrogenic differentiation has been shown  
326 to inhibit chondrogenesis, whereas the addition of other isoforms, such as FGF-9, to chondrogenic  
327 media has been shown to marginally increase matrix production during early chondrogenesis [47]. In  
328 this study, all MSCs were exposed to FGF during expansion, however exposure to FGF during the first  
329 7 days of chondrogenic differentiation did not enhance chondrogenesis and ECM production  
330 (Supplementary Figure 2). IGF, when combined with TGF- $\beta$ , is commonly discussed as a promoter of  
331 chondrogenesis in MSCs [43,48]. IGF alone has been suggested to have similar chondrogenic effects  
332 as TGF- $\beta$ , stimulating proliferation, regulating apoptosis, and inducing the expression of chondrogenic

333 markers in BMSCs. Moreover, the two growth-factors have demonstrated additive effects, resulting  
334 in gene expression analogous to human primary culture chondrocytes [49]. We failed to see a similar  
335 results in this study, as there was no discernible benefit associated with supplementing CDM with IGF  
336 (Supplementary Figure 2).

337 The growth factor hydrocortisone emerged as the principle driving factor within the EGM  
338 supplement capable of promoting more robust chondrogenesis. Intra-articular injection of  
339 glucocorticoids, such as hydrocortisone, is a longstanding means of managing arthritis. Primarily,  
340 glucocorticoid therapy aims to provide symptomatic relief, reducing inflammation and pain within an  
341 affected joint. However, the use of such steroidal agents has been discouraged for the treatment of  
342 OA due to their undesirable effects on cartilage metabolism [50]. Despite this, chondroprotective  
343 properties and other putative benefits of glucocorticoid treatment have been suggested. More  
344 recently, the chondroprotective capacity of hydrocortisone has been found to be heavily dose-  
345 dependent, with beneficial changes associated with low doses both *in vitro* and *in vivo*, whereas higher  
346 doses result in deleterious effects [51]. *In vitro*, the exposure of MSCs to synthetic glucocorticoids for  
347 the initiation of chondrogenesis has been well established through the use of dexamethasone (DEX)  
348 [52,53]. The role of DEX in promoting chondrogenesis has been elucidated through studies  
349 demonstrating that glucocorticoids directly regulate the expression of cartilage ECM genes and/or  
350 enhance TGF- $\beta$ -mediated effects on their expression. Specifically, a positive interaction between TGF-  
351  $\beta$  and glucocorticoid signalling pathways, which are mediated by the glucocorticoid receptor, have  
352 been demonstrated during chondrogenesis [54]. The impact of hydrocortisone, an adrenocortical  
353 hormone, is much less documented. It has been reported to be found in FBS, where it is important in  
354 the modulation of MSC functions such as growth and adhesion [55]. As such, it is often included in  
355 serum-free medium formulations. Additionally, hydrocortisone has been used to ‘activate’  
356 multipotent MSCs for adipogenic differentiation, while its addition during passaging helps to preserve  
357 the self-maintenance capacity of MSCs [56]. In the context of chondrogenesis, hydrocortisone  
358 supplementation in 3D culture with human chondrocytes has been shown to optimise ECM  
359 metabolism. In particular, exposure to physiological levels of hydrocortisone was linked with an  
360 enhanced capacity to synthesise ECM components (aggrecan, collagen type II, and fibronectin) whilst  
361 decreasing the activity of catabolic pathways (suppression of the IL1 catabolic pathway - reduced  
362 intracellular IL1- $\alpha$  and - $\beta$  as well as IL1RI) [57]. Collectively, these results indicate that corticosteroids  
363 can be beneficially leveraged in the engineering of high-quality cartilage microtissues using MSCs.

364 Whilst the mechanism of action remains unclear, we present evidence that suggests  
365 EGM/hydrocortisone treatment can improve the chondrogenic potential of heterogeneous MSC

366 populations. Investigation into the full effects of this novel chondrogenic protocol in terms of its  
367 regulation/re-activation of MSC subpopulations, and/or its effect on chondrogenic genes that are co-  
368 regulated *via* glucocorticoid receptors would provide interesting additional insight and could help  
369 design enhanced chondrogenic cultures in the future. Given the evidence that selection of superior  
370 chondrogenic donors *in vitro* can translate into improved *in vivo* outcomes [58,59], the data presented  
371 in this work represents a simple alternative method for maximising the chondrogenic capacity of MSC  
372 populations that exhibit inherently limited chondrogenesis. As such, effectively implementing this  
373 novel protocol can result in the formation of high-quality cartilage microtissues. To this end, our  
374 preliminary data (Supplementary Figure 3) suggests that exposure to hydrocortisone at a  
375 concentration of 0.2 µg/mL may be beneficial for chondrogenic culture. This evidence, coupled with  
376 our findings relating to the potency of EGM soak loading indicates that a similar soaking, or short-term  
377 exposure strategies (<7 days) may be the most effective means of implementing hydrocortisone  
378 treatment within a chondrogenic culture regime. Ultimately, this work provides a platform to generate  
379 larger engineered cartilage through self-organisation of these high-quality building blocks without the  
380 need for additional cells, unfeasible numbers of microtissue units, or compromising the quality of the  
381 final construct.

## 382 **Conclusion**

383 Collectively, the results of this study indicate that pre-treatment *via* EGM pre-soaking or the  
384 supplementation of chondrogenic differentiation medium with hydrocortisone can provide a simple  
385 and potent means of improving chondrogenesis in heterogeneous MSC cohorts. This work could  
386 enable the generation of more scalable engineered cartilages by ensuring the formation of high-  
387 quality cartilage microtissue building blocks without the need for extensive cell immunophenotyping.

## 388 **Acknowledgements**

389 This publication was developed with the financial support of Science Foundation Ireland (SFI) under  
390 grant number 12/RC/2278 and 17/SP/4721. This research is co-funded by the European Regional  
391 Development Fund and SFI under Ireland's European Structural and Investment Fund. This research  
392 has been co-funded by Johnson & Johnson 3D Printing Innovation & Customer Solutions, Johnson &  
393 Johnson Services Inc.

## 394 References

- 395 [1] K.A. Athanasiou, R. Eswaramoorthy, P. Hadidi, J.C. Hu, Self-Organization and the Self-  
396 Assembling Process in Tissue Engineering, *Annu. Rev. Biomed. Eng.* 15 (2013) 115–136.  
397 <https://doi.org/10.1146/annurev-bioeng-071812-152423>.
- 398 [2] J.C. Hu, K.A. Athanasiou, A Self-Assembling Process in Articular Cartilage Tissue Engineering,  
399 *Tissue Eng.* 12 (2006) 969–979. <https://doi.org/10.1089/ten.2006.12.969>.
- 400 [3] A.M. DeLise, L. Fischer, R.S. Tuan, Cellular interactions and signaling in cartilage development,  
401 *Osteoarthr. Cartil.* 8 (2000) 309–334. <https://doi.org/10.1053/joca.1999.0306>.
- 402 [4] M. Centola, B. Tonnarelli, S. Schären, N. Glaser, A. Barbero, I. Martin, Priming 3D Cultures of  
403 Human Mesenchymal Stromal Cells Toward Cartilage Formation Via Developmental  
404 Pathways, *Stem Cells Dev.* 22 (2013) 2849–2858. <https://doi.org/10.1089/scd.2013.0216>.
- 405 [5] G. Ofek, C.M. Revell, J.C. Hu, D.D. Allison, K.J. Grande-Allen, K.A. Athanasiou, Matrix  
406 development in self-assembly of articular cartilage, *PLoS One.* 3 (2008).  
407 <https://doi.org/10.1371/journal.pone.0002795>.
- 408 [6] D.J. Responde, B. Arzi, R.M. Natoli, J.C. Hu, K.A. Athanasiou, Mechanisms underlying the  
409 synergistic enhancement of self-assembled neocartilage treated with chondroitinase-ABC and  
410 TGF- $\beta$ 1, *Biomaterials.* 33 (2012) 3187–3194.  
411 <https://doi.org/10.1016/j.biomaterials.2012.01.028>.
- 412 [7] J.J. Ng, Y. Wei, B. Zhou, J. Bernhard, S. Robinson, A. Burapachaisri, X.E. Guo, G. Vunjak-  
413 Novakovic, Recapitulation of physiological spatiotemporal signals promotes in vitro formation  
414 of phenotypically stable human articular cartilage, *Proc. Natl. Acad. Sci.* 114 (2017) 2556–  
415 2561. <https://doi.org/10.1073/pnas.1611771114>.
- 416 [8] W.D. Lee, M.B. Hurtig, R.A. Kandel, W.L. Stanford, Membrane Culture of Bone Marrow  
417 Stromal Cells Yields Better Tissue Than Pellet Culture for Engineering Cartilage-Bone  
418 Substitute Biphasic Constructs in a Two-Step Process, *Tissue Eng. Part C Methods.* 17 (2011)  
419 939–948. <https://doi.org/10.1089/ten.tec.2011.0147>.
- 420 [9] L. Zhang, P. Su, C. Xu, J. Yang, W. Yu, D. Huang, Chondrogenic differentiation of human  
421 mesenchymal stem cells: A comparison between micromass and pellet culture systems,  
422 *Biotechnol. Lett.* 32 (2010) 1339–1346. <https://doi.org/10.1007/s10529-010-0293-x>.
- 423 [10] J. Nulty, R. Burdis, D.J. Kelly, Biofabrication of Prevascularised Hypertrophic Cartilage  
424 Microtissues for Bone Tissue Engineering, *Front. Bioeng. Biotechnol.* 9 (2021) 1–16.  
425 <https://doi.org/10.3389/fbioe.2021.661989>.
- 426 [11] M. Bhattacharjee, J. Coburn, M. Centola, S. Murab, A. Barbero, D.L. Kaplan, I. Martin, S.  
427 Ghosh, Tissue engineering strategies to study cartilage development, degeneration and  
428 regeneration, *Adv. Drug Deliv. Rev.* 84 (2015) 107–122.  
429 <https://doi.org/10.1016/j.addr.2014.08.010>.
- 430 [12] G. Nilsson Hall, L.F. Mendes, C. Gklava, L. Geris, F.P. Luyten, I. Papantoniou, Developmentally  
431 Engineered Callus Organoid Bioassemblies Exhibit Predictive In Vivo Long Bone Healing, *Adv.*  
432 *Sci.* 7 (2020) 1–16. <https://doi.org/10.1002/advs.201902295>.
- 433 [13] L. De Moor, E. Beyls, H. Declercq, Scaffold Free Microtissue Formation for Enhanced Cartilage  
434 Repair, *Ann. Biomed. Eng.* (2019). <https://doi.org/10.1007/s10439-019-02348-4>.

- 435 [14] J. Leijten, L.S. Moreira Teixeira, J. Bolander, W. Ji, B. Vanspauwen, J. Lammertyn, J. Schrooten,  
436 F.P. Luyten, Bioinspired seeding of biomaterials using three dimensional microtissues induces  
437 chondrogenic stem cell differentiation and cartilage formation under growth factor free  
438 conditions, *Sci. Rep.* 6 (2016) 1–12. <https://doi.org/10.1038/srep36011>.
- 439 [15] G.D. DuRaine, W.E. Brown, J.C. Hu, K.A. Athanasiou, Emergence of Scaffold-Free Approaches  
440 for Tissue Engineering Musculoskeletal Cartilages, *Ann. Biomed. Eng.* 43 (2015) 543–554.  
441 <https://doi.org/10.1007/s10439-014-1161-y>.
- 442 [16] M. Sarem, O. Otto, S. Tanaka, V.P. Shastri, Cell number in mesenchymal stem cell aggregates  
443 dictates cell stiffness and chondrogenesis, *Stem Cell Res. Ther.* 10 (2019) 10.  
444 <https://doi.org/10.1186/s13287-018-1103-y>.
- 445 [17] M. Lehmann, F. Martin, K. Mannigel, K. Kaltschmidt, U. Sack, U. Anderer, Three-dimensional  
446 scaffold-free fusion culture: The way to enhance chondrogenesis of in vitro propagated  
447 human articular chondrocytes, *Eur. J. Histochem.* 57 (2013) 206–216.  
448 <https://doi.org/10.4081/ejh.2013.e31>.
- 449 [18] R. Burdis, D.J. Kelly, Biofabrication and bioprinting using cellular aggregates, microtissues and  
450 organoids for the engineering of musculoskeletal tissues, *Acta Biomater.* 126 (2021) 1–14.  
451 <https://doi.org/10.1016/j.actbio.2021.03.016>.
- 452 [19] S. Bhumiratana, R.E. Eton, S.R. Oungouljian, L.Q. Wan, G.A. Ateshian, G. Vunjak-Novakovic,  
453 Large, stratified, and mechanically functional human cartilage grown in vitro by mesenchymal  
454 condensation, *Proc. Natl. Acad. Sci.* 111 (2014) 6940–6945.  
455 <https://doi.org/10.1073/pnas.1324050111>.
- 456 [20] K. Futrega, J.S. Palmer, M. Kinney, W.B. Lott, M.D. Ungrin, P.W. Zandstra, M.R. Doran, The  
457 microwell-mesh: A novel device and protocol for the high throughput manufacturing of  
458 cartilage microtissues, *Biomaterials.* 62 (2015) 1–12.  
459 <https://doi.org/10.1016/j.biomaterials.2015.05.013>.
- 460 [21] B.K. Babur, K. Futrega, W.B. Lott, T.J. Klein, J. Cooper-White, M.R. Doran, High-throughput  
461 bone and cartilage micropellet manufacture, followed by assembly of micropellets into  
462 biphasic osteochondral tissue, *Cell Tissue Res.* 361 (2015) 755–768.  
463 <https://doi.org/10.1007/s00441-015-2159-y>.
- 464 [22] G.N. Hall, W.L. Tam, K.S. Andrikopoulos, L. Casas-Fraile, G.A. Voyiatzis, L. Geris, F.P. Luyten, I.  
465 Papantoniou, Patterned, organoid-based cartilaginous implants exhibit zone specific  
466 functionality forming osteochondral-like tissues in vivo, *Biomaterials.* 273 (2021) 120820.  
467 <https://doi.org/10.1016/j.biomaterials.2021.120820>.
- 468 [23] R.Z. Lin, H.Y. Chang, Recent advances in three-dimensional multicellular spheroid culture for  
469 biomedical research, *Biotechnol. J.* 3 (2008) 1172–1184.  
470 <https://doi.org/10.1002/biot.200700228>.
- 471 [24] J.M. Karp, J. Yeh, G. Eng, J. Fukuda, J. Blumling, K.Y. Suh, J. Cheng, A. Mahdavi, J. Borenstein,  
472 R. Langer, A. Khademhosseini, Controlling size, shape and homogeneity of embryoid bodies  
473 using poly(ethylene glycol) microwells, *Lab Chip.* 7 (2007) 786–794.  
474 <https://doi.org/10.1039/b705085m>.
- 475 [25] H. Tekin, M. Anaya, M.D. Brigham, C. Nauman, R. Langer, A. Khademhosseini, Stimuli-  
476 responsive microwells for formation and retrieval of cell aggregates, *Lab Chip.* 10 (2010)  
477 2411–2418. <https://doi.org/10.1039/c004732e>.

- 478 [26] B.C. Kim, J.H. Kim, H.J. An, W. Byun, J.H. Park, I.K. Kwon, J.S. Kim, Y.S. Hwang, Microwell-  
479 mediated micro cartilage-like tissue formation of adipose-derived stem cell, *Macromol. Res.*  
480 22 (2014) 287–296. <https://doi.org/10.1007/s13233-014-2044-7>.
- 481 [27] G.S. Jeong, Y. Jun, J.H. Song, S.H. Shin, S.H. Lee, Meniscus induced self organization of  
482 multiple deep concave wells in a microchannel for embryoid bodies generation, *Lab Chip*. 12  
483 (2012) 159–166. <https://doi.org/10.1039/c1lc20619b>.
- 484 [28] L. De Moor, S. Fernandez, C. Vercruyse, L. Tytgat, M. Asadian, N. De Geyter, S. Van  
485 Vlierberghe, P. Dubruel, H. Declercq, Hybrid Bioprinting of Chondrogenically Induced Human  
486 Mesenchymal Stem Cell Spheroids, *Front. Bioeng. Biotechnol.* 8 (2020) 1–20.  
487 <https://doi.org/10.3389/fbioe.2020.00484>.
- 488 [29] L.S. Moreira Teixeira, J.C.H. Leijten, J. Sobral, R. Jin, A.A. van Apeldoorn, J. Feijen, C. van  
489 Blitterswijk, P.J. Dijkstra, M. Karperien, High throughput generated micro-aggregates of  
490 chondrocytes stimulate cartilage formation in vitro and in vivo, *Eur. Cells Mater.* 23 (2012)  
491 387–399. <https://doi.org/10.22203/eCM.v023a30>.
- 492 [30] S.S. Ho, B.P. Hung, N. Heyrani, M.A. Lee, J.K. Leach, Hypoxic Preconditioning of Mesenchymal  
493 Stem Cells with Subsequent Spheroid Formation Accelerates Repair of Segmental Bone  
494 Defects, *Stem Cells*. 36 (2018) 1393–1403. <https://doi.org/10.1002/stem.2853>.
- 495 [31] A.P. Napolitano, D.M. Dean, A.J. Man, J. Youssef, D.N. Ho, A.P. Rago, M.P. Lech, J.R. Morgan,  
496 Scaffold-free three-dimensional cell culture utilizing micromolded nonadhesive hydrogels,  
497 *Biotechniques*. 43 (2007) 494–500. <https://doi.org/10.2144/000112591>.
- 498 [32] L. De Moor, I. Merovci, S. Baetens, J. Verstraeten, P. Kowalska, D. V. Krysko, W.H. De Vos, H.  
499 Declercq, High-throughput fabrication of vascularized spheroids for bioprinting,  
500 *Biofabrication*. 10 (2018) 35009. <https://doi.org/10.1088/1758-5090/aac7e6>.
- 501 [33] L. Zhao, S. Mok, C. Moraes, Micropocket hydrogel devices for all-in-one formation, assembly,  
502 and analysis of aggregate-based tissues, *Biofabrication*. (2019).  
503 <https://doi.org/10.1088/1758-5090/ab30b4>.
- 504 [34] V. Mironov, R.P. Visconti, V. Kasyanov, G. Forgacs, C.J. Drake, R.R. Markwald, Organ printing:  
505 Tissue spheroids as building blocks, *Biomaterials*. 30 (2009) 2164–2174.  
506 <https://doi.org/10.1016/j.biomaterials.2008.12.084>.
- 507 [35] C.M. McLeod, R.L. Mauck, On the origin and impact of mesenchymal stem cell heterogeneity:  
508 New insights and emerging tools for single cell analysis, *Eur. Cells Mater.* 34 (2017) 217–231.  
509 <https://doi.org/10.22203/eCM.v034a14>.
- 510 [36] J. van der Stok, M.K.E. Koolen, H. Jahr, N. Kops, J.H. Waarsing, H. Weinans, O.P. van der Jagt,  
511 Chondrogenically differentiated mesenchymal stromal cell pellets stimulate endochondral  
512 bone regeneration in critical-sized bone defects, *Eur. Cells Mater.* 27 (2014) 137–148.  
513 <https://doi.org/10.22203/eCM.v027a11>.
- 514 [37] R. Burdis, D.J. Kelly, Biofabrication and bioprinting using cellular aggregates, microtissues and  
515 organoids for the engineering of musculoskeletal tissues, *Acta Biomater.* 126 (2021) 1–14.  
516 <https://doi.org/10.1016/j.actbio.2021.03.016>.
- 517 [38] A. Yamasaki, Y. Kunitomi, D. Murata, T. Sunaga, T. Kuramoto, T. Sogawa, K. Misumi,  
518 Osteochondral regeneration using constructs of mesenchymal stem cells made by bio three-  
519 dimensional printing in mini-pigs, *J. Orthop. Res.* 37 (2019) 1398–1408.  
520 <https://doi.org/10.1002/jor.24206>.



- 521 [39] A.M. McDermott, S. Herberg, D.E. Mason, J.M. Collins, H.B. Pearson, J.H. Dawahare, R. Tang,  
522 A.N. Patwa, M.W. Grinstaff, D.J. Kelly, E. Alsberg, J.D. Boerckel, Recapitulating bone  
523 development through engineered mesenchymal condensations and mechanical cues for  
524 tissue regeneration, *Sci. Transl. Med.* 11 (2019) 1–16.  
525 <https://doi.org/10.1126/scitranslmed.aav7756>.
- 526 [40] D. Murata, S. Akieda, K. Misumi, K. Nakayama, Osteochondral Regeneration with a Scaffold-  
527 Free Three-Dimensional Construct of Adipose Tissue-Derived Mesenchymal Stromal Cells in  
528 Pigs, *Tissue Eng. Regen. Med.* 15 (2018) 101–113. [https://doi.org/10.1007/s13770-017-0091-](https://doi.org/10.1007/s13770-017-0091-9)  
529 9.
- 530 [41] A. Yamasaki, Y. Kunitomi, D. Murata, T. Sunaga, T. Kuramoto, T. Sogawa, K. Misumi,  
531 Osteochondral regeneration using constructs of mesenchymal stem cells made by bio three-  
532 dimensional printing in mini-pigs, *J. Orthop. Res.* 37 (2019) 1398–1408.  
533 <https://doi.org/10.1002/jor.24206>.
- 534 [42] W. Kafienah, T.J. Sims, *Biochemical Methods for the Analysis of Tissue-Engineered Cartilage*,  
535 in: *Biopolym. Methods Tissue Eng.*, Humana Press, New Jersey, 2004: pp. 217–230.  
536 <https://doi.org/10.1385/1-59259-428-X:217>.
- 537 [43] X. Tang, L. Fan, M. Pei, L. Zeng, Z. Ge, Evolving concepts of chondrogenic differentiation:  
538 History, state-of-the-art and future perspectives, *Eur. Cells Mater.* 30 (2015) 12–27.  
539 <https://doi.org/10.22203/eCM.v030a02>.
- 540 [44] R.A. Somoza, J.F. Welter, D. Correa, A.I. Caplan, Chondrogenic differentiation of mesenchymal  
541 stem cells: Challenges and unfulfilled expectations, *Tissue Eng. - Part B Rev.* 20 (2014) 596–  
542 608. <https://doi.org/10.1089/ten.teb.2013.0771>.
- 543 [45] L.A. Solchaga, K. Penick, J.D. Porter, V.M. Goldberg, A.I. Caplan, J.F. Welter, FGF-2 enhances  
544 the mitotic and chondrogenic potentials of human adult bone marrow-derived mesenchymal  
545 stem cells, *J. Cell. Physiol.* 203 (2005) 398–409. <https://doi.org/10.1002/jcp.20238>.
- 546 [46] F. Ng, S. Boucher, S. Koh, K.S.R. Sastry, L. Chase, U. Lakshmipathy, C. Choong, Z. Yang, M.C.  
547 Vemuri, M.S. Rao, V. Tanavde, PDGF, *tgf- 2*. And FGF signaling is important for differentiation  
548 and growth of mesenchymal stem cells (mscs): Transcriptional profiling can identify markers  
549 and signaling pathways important in differentiation of MSCs into adipogenic, chondrogenic,  
550 and ost, *Blood.* 112 (2008) 295–307. <https://doi.org/10.1182/blood-2007-07-103697>.
- 551 [47] C.A. Hellingman, W. Koevoet, N. Kops, E. Farrell, H. Jahr, W. Liu, R.J.B. De Jong, D.A. Frenz,  
552 G.J.V.M. Van Osch, Fibroblast growth factor receptors in in vitro and in vivo chondrogenesis:  
553 Relating tissue engineering using adult mesenchymal stem cells to embryonic development,  
554 *Tissue Eng. - Part A.* 16 (2010) 545–556. <https://doi.org/10.1089/ten.tea.2008.0551>.
- 555 [48] S. Boeuf, W. Richter, Chondrogenesis of mesenchymal stem cells: Role of tissue source and  
556 inducing factors, *Stem Cell Res. Ther.* 1 (2010) 1–9. <https://doi.org/10.1186/scrt31>.
- 557 [49] L. Longobardi, L. O’Rear, S. Aakula, B. Johnstone, K. Shimer, A. Chytil, W.A. Horton, H.L.  
558 Moses, A. Spagnoli, Effect of IGF-I in the chondrogenesis of bone marrow mesenchymal stem  
559 cells in the presence or absence of TGF- $\beta$  signaling, *J. Bone Miner. Res.* 21 (2006) 626–636.  
560 <https://doi.org/10.1359/jbmr.051213>.
- 561 [50] M. Ulrich-Vinther, M.D. Maloney, E.M. Schwarz, R. Rosier, R.J. O’Keefe, Articular Cartilage  
562 Biology, *J. Am. Acad. Orthop. Surg.* 11 (2003) 421–430. [https://doi.org/10.5435/00124635-](https://doi.org/10.5435/00124635-200311000-00006)  
563 200311000-00006.



- 564 [51] C. Wernecke, H.J. Braun, J.L. Dragoo, The effect of intra-articular corticosteroids on articular  
565 cartilage: A systematic review, *Orthop. J. Sport. Med.* 3 (2015) 1–7.  
566 <https://doi.org/10.1177/2325967115581163>.
- 567 [52] B. Johnstone, T.M. Hering, A.I. Caplan, V.M. Goldberg, J.U. Yoo, In Vitro Chondrogenesis of  
568 Bone Marrow-Derived Mesenchymal Progenitor Cells, *Exp. Cell Res.* 238 (1998) 265–272.  
569 <https://doi.org/10.1006/excr.1997.3858>.
- 570 [53] T. Li, B. Liu, K. Chen, Y. Lou, Y. Jiang, D. Zhang, Small molecule compounds promote the  
571 proliferation of chondrocytes and chondrogenic differentiation of stem cells in cartilage  
572 tissue engineering, *Biomed. Pharmacother.* 131 (2020) 110652.  
573 <https://doi.org/10.1016/j.biopha.2020.110652>.
- 574 [54] A. Derfoul, G.L. Perkins, D.J. Hall, R.S. Tuan, Glucocorticoids Promote Chondrogenic  
575 Differentiation of Adult Human Mesenchymal Stem Cells by Enhancing Expression of Cartilage  
576 Extracellular Matrix Genes, *Stem Cells.* 24 (2006) 1487–1495.  
577 <https://doi.org/10.1634/stemcells.2005-0415>.
- 578 [55] L.R. Devireddy, M. Myers, R. Screven, Z. Liu, L. Boxer, A serum-free medium formulation  
579 efficiently supports isolation and propagation of canine adipose-derived mesenchymal  
580 stem/stromal cells, *PLoS One.* 14 (2019) 1–21.  
581 <https://doi.org/10.1371/journal.pone.0210250>.
- 582 [56] N.N. Shipunova, N.A. Petinati, N.I. Drize, Effect of hydrocortisone on multipotent human  
583 mesenchymal stromal cells, *Bull. Exp. Biol. Med.* 155 (2013) 159–163.  
584 <https://doi.org/10.1007/s10517-013-2102-8>.
- 585 [57] J. Wang, D. Elewaut, I. Hoffman, E.M. Veys, G. Verbruggen, Physiological levels of  
586 hydrocortisone maintain an optimal chondrocyte extracellular matrix metabolism, *Ann.*  
587 *Rheum. Dis.* 63 (2004) 61–66. <https://doi.org/10.1136/ard.2002.005298>.
- 588 [58] Y. Mifune, T. Matsumoto, S. Murasawa, A. Kawamoto, R. Kuroda, T. Shoji, T. Kuroda, T. Fukui,  
589 Y. Kawakami, M. Kurosaka, T. Asahara, Therapeutic superiority for cartilage repair by CD271-  
590 positive marrow stromal cell transplantation, *Cell Transplant.* 22 (2013) 1201–1211.  
591 <https://doi.org/10.3727/096368912X657378>.
- 592 [59] L. Jiang, A. Ma, L. Song, Y. Hu, H. Dun, P. Daloz, Y. Yu, J. Jiang, M. Zafarullah, H. Chen,  
593 Cartilage regeneration by selected chondrogenic clonal mesenchymal stem cells in the  
594 collagenase-induced monkey osteoarthritis model, *J. Tissue Eng. Regen. Med.* 8 (2014) 896–  
595 905. <https://doi.org/10.1002/term.1676>.
- 596
